## NON-RANDOM TIMING OF ECOLOGICAL SHIFTS ON CARIBBEAN CORAL REEFS SUGGESTS REGIONAL CAUSES OF CHANGE

WILLIAM F. PRECHT\*<sup>1</sup>, RICHARD B. ARONSON<sup>2</sup>, TOBY A. GARDNER<sup>3</sup>, JENNIFER A. GILL<sup>4</sup>, JULIE P. HAWKINS<sup>5</sup>, EDWIN A. HERNÁNDEZ-DELGADO<sup>6</sup>, WALTER C. JAAP<sup>7</sup>, TIM R. McCLANAHAN<sup>8</sup>, MELANIE D. MCFIELD<sup>9</sup>, THADDEUS J.T. MURDOCH<sup>10</sup>, MAGGY M. NUGUES<sup>11</sup>, CALLUM M. ROBERTS<sup>12</sup>, CHRISTIANE K. SCHELLEN<sup>13</sup>, ANDREW R. WATKINSON<sup>14</sup>, and ISABELLE M. CÔTÉ<sup>15</sup>

### AUTHORS' ADDRESS

1. Marine and Coastal Programs, Dial Cordy and Associates, 1011 Ives Dairy Road, Suite 210, Miami, FL 33179, USA <William.Precht@gmail.com>,
2. Department of Ocean Engineering and Marine Sciences, Florida Institute of Technology, 150 West University Boulevard, Melbourne, FL 32901, USA <raronson@fit.edu>,
3. Stockholm Environment Institute, Linegatan 87D, Stockholm, Sweden. <tobyagardner@gmail.com>,
4. Centre for Ecology, Evolution and Conservation, School of Biological Sciences, University of East Anglia, Norwich NR4 7TJ, UK <j.gill@uea.ac.uk >
5. Environment Department, University of York, YO10 5DD, UK <julie.hawkins@york.ac.uk>,
6. Department of Environmental Sciences and Center for Applied Tropical Ecology and Conservation, Applied Marine Ecology Laboratory, University of Puerto Rico, 17 Ave Universidad, STE 1701, San Juan, PR 00925-2537; Sociedad Ambiente Marino, P.O. Box 22158, San Juan, Puerto Rico 00931-2158 <edwin.hernandezdelgado@gmail.com>,
7. Lithophyte Research LLC, 273 Catalan Blvd NE, Saint Petersburg, FL 33704, USA <wjaap@tampabay.rr.com>,
8. Wildlife Conservation Society, Marine Programs, Bronx, NY 10460, USA <tmccclanahan@wcs.org>,
9. Smithsonian Marine Station, Ft Pierce FL 34949 <mcfieladm@si.edu >
10. Murdoch Marine Ltd., P.O. Box 513, Warwick, WKBX, Bermuda <tmurdoch@murdochmarine.com>,
11. EPHE, Laboratoire d'Excellence "CORAIL", PSL Research University, UPVD, CNRS, USR 3278 CRIOBE, F-66360 Perpignan, France <maggy.nugues@univ-perp.fr>,
12. Environment Department, University of York, YO10 5DD, UK <callum.roberts@york.ac.uk>,
13. GEOMAR, Helmholtz Centre for Ocean Research Kiel, Düsternbrooker Weg 20, 24105, Kiel, Germany <cschelten@geomar.de>,
14. Living with Environmental Change, School of Environmental Sciences, University of East Anglia, Norwich NR4 7TJ, UK <andrew.watkinson@lvec.org.uk>
15. Department of Biological Sciences, Simon Fraser University, Burnaby BC, V5S 1A6, Canada <imcote@sfu.ca>

\*CORRESPONDING AUTHOR

## ABSTRACT

Caribbean reefs have experienced unprecedented changes in the past four decades. Of great concern is the perceived widespread shift from coral to macroalgal dominance and the question of whether it represents a new, stable equilibrium for coral-reef communities. The primary causes of the shift -- grazing pressure (top-down), nutrient loading (bottom-up) or direct coral mortality (side-in) -- still remain somewhat controversial in the coral reef literature. We have attempted to tease out the relative importance of each of these causes. Four insights emerge from our analysis of an early regional dataset of information on the benthic composition of Caribbean reefs spanning the years 1977–2001. First, although three-quarters of reef sites have experienced coral declines concomitant with macroalgal increases, fewer than 10% of the more than 200 sites studied were dominated by macroalgae in 2001, by even the most conservative definition of dominance. Using relative dominance as the threshold, a total of 49 coral-to-macroalgal shifts were detected. This total represents ~35% of all sites that were dominated by coral at the start of their monitoring periods. Four shifts (8.2%) occurred because of coral loss with no change in macroalgal cover, 15 (30.6%) occurred because of macroalgal gain without coral loss, and 30 (61.2%) occurred owing to concomitant coral decline and macroalgal increase. Second, the timing of shifts at the regional scale is most consistent with the side-in model of reef degradation, which invokes coral mortality as a precursor to macroalgal takeover, because more shifts occurred after regional coral-mortality events than expected by chance. Third, instantaneous observations taken at the start and end of the time-series for individual sites showed these reefs existed along a continuum of coral and macroalgal cover. The continuous, broadly negative relationship between coral and macroalgal cover suggests that in some cases coral-to-macroalgal phase shifts may be reversed by removing sources of perturbation or restoring critical components such as the herbivorous sea urchin *Diadema antillarum* to the system. The five instances in which macroalgal dominance was reversed corroborate the conclusion that macroalgal dominance is not a stable, alternative community state as has been commonly assumed. Fourth, the fact that the loss in regional coral cover and concomitant changes to the benthic community are related to punctuated, discrete events with known causes (i.e. coral disease and bleaching), lends credence to the hypothesis that coral reefs of the Caribbean have been under assault from climate-change-related maladies since the 1970s.

## INTRODUCTION

In their natural state, coral reefs are non-equilibrial, dynamic, disturbance-dominated ecosystems. However, in the past four decades coral reefs around the world have experienced unprecedented ecological changes (Wilkinson 2002, Gardner et al. 2003, Bruno and Selig 2007). Most notable have been a drastic decline in living cover of hard corals and an increase in macroalgal abundance (Aronson and Precht 2001a, 2001b, McManus and Polsenberg 2004). Increases in macroalgae have been interpreted by some authors as the single best indicator of reef degradation (Steneck and Sala 2005, Mumby et al. 2006, 2007).

The first regional-scale, quantitative assessment of the extent of coral loss showed that, in aggregate, Caribbean reefs experienced a decline in coral cover from ~50% to ~10%, from 1977 to 2001 (Gardner et al. 2003). Using a larger data set, Schutte et al. (2010) calculated that the average coral cover was around 16% in 2006. More recently, Jackson et al. (2014) noted “that the average coral cover for the wider Caribbean was around 17% in 2012.” On some reefs, the decline of coral cover has been accompanied by an increase in macroalgal cover, leading to a community phase shift *sensu* Done (1992). The prevalence of shifts from

the coral-dominated state to a macroalgae-dominated state was reviewed by Bruno et al. (2009). They argued that most reefs around the world are not dominated by macroalgae (with dominance defined as  $\geq 50\%$  cover); rather, most reefs are characterized by macroalgal cover and highly variable coral cover that averages  $< 50\%$ . Although on many reefs there are more macroalgae today than compared with any recorded historical baseline (see Bruno et al. 2014), the causes of the increase, particularly on Caribbean reefs, are still debated in the literature. Three non-exclusive scenarios have been proposed: the top-down (overfishing), bottom-up (eutrophication and pollution) and side-in (perturbations causing direct coral mortality and habitat loss) models (Precht and Aronson 2006).

The top-down model of reef decline, which suggests that macroalgal dominance resulted primarily from declines in grazing intensity and was derived mainly from observations of Jamaican reefs, holds that phase shifts are primarily a consequence of overfishing (Knowlton 1992, Hughes 1994, Hughes et al. 1999, Jackson et al. 2001, Bellwood et al. 2004). In this model, the depletion of large predators, which occurred centuries ago (Jackson 2001, Jackson et al. 2001); the subsequent switch to overfishing of herbivores (Pauly et al. 1998); and finally the mass mortality in 1983–1984 of the herbivorous sea urchin *Diadema antillarum* (Lessios 1988), the grazing activity of which had concealed the loss of herbivorous fishes (Jackson 2001), triggered a proliferation of macroalgae and concomitant coral mortality (Hughes 1994, Jackson et al. 2001). Although the link between herbivory and macroalgal abundance is clear (Lessios 1988, Aronson and Precht 2000, Williams and Polunin 2001, Idjadi et al. 2010, Adam et al. 2015), the role of macroalgal growth in causing significant coral mortality is ambiguous (Aronson and Precht 2006, Nugues and Bak 2006, see also Alevizon and Porter 2014).

The bottom-up scenario maintains that declining water quality, particularly as a result of nutrient enrichment, causes shifts from coral to macroalgal dominance, as was observed in the classic example from Kaneohe Bay, Hawaii (Banner 1974, Hunter and Evans 1995, Bahr et al. 2015). Lapointe (1997) argued that nutrient enrichment is the main cause of shifts to algae-dominated states on reefs throughout the Caribbean, and others have argued that “the collapse of many Caribbean coral reefs was long preceded by... increased nutrient and sediment runoff from land” (Bellwood et al. 2004). A number of reviews have assessed the role of nutrient enrichment in the decline of corals (Lirman 2001, Szmant 2002, Precht and Miller 2007) and the relationships among nutrients, algae, and algae–coral competition (Hughes et al. 1999, Miller et al. 1999, McClanahan et al. 2004, McManus and Polsenberg 2004, Littler et al. 2006, Nugues and Bak 2006, Furman and Heck 2008, Mumby and Steneck 2008, Sotka and Hay 2009). In the Florida Keys, Lirman and Fong (2007) showed that patterns of coral cover, population size-structure, growth, and mortality are not related to water-quality gradients. These authors have all essentially concluded that the regional losses of coral cover and increases in macroalgal abundance are not due to nutrient enrichment alone but to a variety of causes.

The side-in scenario invokes perturbations such as infectious diseases, outbreaks of predators, bleaching events, tsunamis, earthquakes, hurricane impacts, and hypothermic stress as important causes of ecological change on coral reefs. These types of disturbance are well-documented, direct causes of the loss of coral cover and habitat on Caribbean reefs (Knowlton et al. 1981, Woodley et al. 1981, Stoddart 1985, Aronson and Precht 2001a, 2001b, Gardner et al. 2005; McWilliams et al. 2005, Scheffers et al. 2006, Lirman et al. 2011, Aronson et al. 2012; Toth et al. 2014). Many authors have suggested that coral mortality itself was the crucial precondition for macroalgal dominance (Ostrander et al. 2000, Lirman 2001, McManus and Polsenberg 2004, Aronson and Precht 2001a, 2001b, 2006; Nugues and Bak 2008, Alevizon and Porter 2014). Macroalgae are also perceived as harmful because in

high abundance they can reduce coral recruitment (Kuffner et al. 2006, Box and Mumby 2007, Birrell et al. 2008, Ritson-Williams et al. 2009, Idjadi et al. 2010), potentially slowing the recovery of coral populations from natural and anthropogenic disturbances.

Identifying the causes of ecological change on Caribbean reefs is a complex task because they are likely to vary among reefs and include a combination of localized and regional stressors that have acted separately or in concert at different times on different reefs. We explicitly subscribe to the pluralistic view of Quinn and Dunham (1983) that ecology seeks to evaluate the relative importance of the many causes underlying an observed pattern. There is evidence that on some reefs a combination of factors, including top-down, bottom-up, and side-in causes, may act in concert leading to an extreme situation of dominance by macroalgae (Paine et al. 1998, McClanahan et al. 2002, Côté et al. 2013). It should, however, be possible to gain more precise insight into the regional cause(s) of algal dominance by examining the temporal pattern of coral-to-macroalgae phase shifts in relation to large-scale, punctuated disturbances, such as the catastrophic loss of the keystone herbivore *D. antillarum* to a pandemic disease in 1983–1984 and to episodes of coral disease and mass coral bleaching.

In this paper, we quantify the prevalence of coral-to-macroalgae and macroalgae-to-coral shifts across the Caribbean region over three decades. By examining the timing of the phase shifts, we evaluate the relative likelihood of the causes proposed for these transitions. We also comment on the idea that reefs of the Caribbean have become vast carpets of seaweed (Ogden 1995, Jackson et al. 2001, Pandolfi et al. 2005), and we attempt to discern whether coral- and macroalgae-dominated communities are stable endpoints, each resistant to conversion to the other. Clarifying these hypothetical and empirical aspects of reef ecology is critical to developing pragmatic approaches to coral-reef conservation and management.

## METHODS

### Data acquisition

Time-series of data on hard-coral and macroalgal cover for reef sites spanning the wider Caribbean basin (Fig. 1) were obtained through electronic and manual literature searches, as well as direct personal communications with reef scientists, site managers and institutional librarians. Electronic literature searches were conducted using the Science Citation Index (SCI) and Aquatic Sciences and Fisheries Abstracts (ASFA) from 1981 to 2001 and 1988 to 2001, respectively, covering a period of extensive changes in benthic composition on coral reefs (Gardner et al. 2003, Côté et al. 2005). All relevant references cited in these publications were also checked. The only selection criterion employed was that the study reported percent cover of either or both target benthic components, with replicated measurements, from a site within the region. Sites were deemed separate if they were defined as such in the study. When a site crossed a steep depth gradient, parts of the replicate transects were pooled into smaller depth-ranges (e.g. Dustan and Halas 1987).

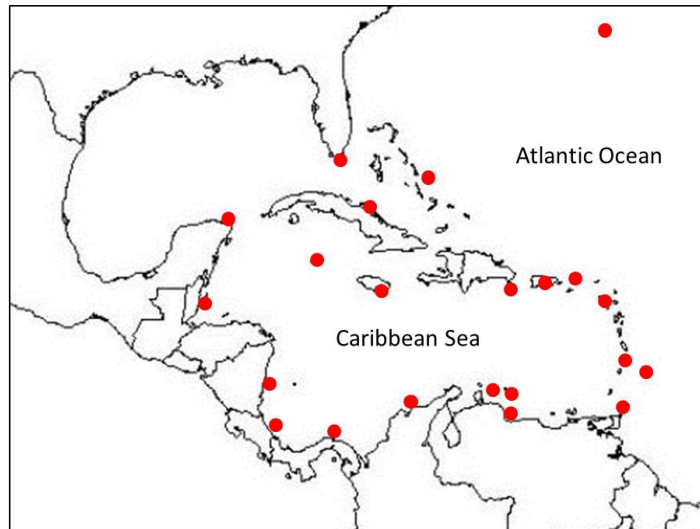

**Figure 1.** Regional distribution of study sites in the wider Caribbean basin. The study sites from which monitoring data were sourced are shown as solid-red circles. Figure modified from original in Gardner et al. (2003; see Table S1).

### **Coral–macroalgae phase shifts and reversals**

We defined macroalgae as all erect and anatomically complex algal forms with canopy heights usually >10 mm (*sensu* Steneck 1988). Crustose coralline algae and algal turfs are also functionally important members of the coral-reef algal assemblage and changes in their relative abundance over time and space may also be critical metrics in diagnosing reef health (e.g. Birrell et al. 2005, Jorissen et al. 2016). However, we did not consider these benthic components in our analysis because many reef-monitoring programs do not differentiate between turfs and other non-erect algal forms (Aronson and Precht 2006, Bruno et al. 2014). Crustose coralline algae, fine algal turfs, and bare space (‘CTB’) are essentially indistinguishable from one another using rapid-assessment monitoring protocols (Aronson et al. 1994, Aronson and Precht 2000).

There is no generally accepted definition of what constitutes a phase shift from corals to macroalgae (Rogers and Miller 2006). The term ‘dominance’ itself is ill-defined in the ecological literature (Bruno et al. 2009, Alevizon and Porter 2014). For example, the definition from Biology Online (2013) is “the species that predominates in an ecological community, particularly when they are most numerous...” But by what comparative threshold do we evaluate the component that is “most numerous?” In quantitative terms, dominance can be a simple majority, which is to say a component (e.g., hard corals or macroalgae) that is more than half of the entire group (i.e., all benthic components combined). By contrast, plurality is the largest subset in a multi-part system. A plurality is not necessarily a majority, as the largest subset may be less than half of the entire group. Finally, relative majority (or relative dominance) is also a subset in a multi-part system but it applies only to one component (e.g., coral) relative to another component (e.g., macroalgae) in the system. At present, there is no consensus in the ecological literature as to whether a simple majority, a plurality, or a relative majority constitutes ecological dominance.

We examined the prevalence of macroalgal dominance in three ways. First, we considered absolute dominance (or majority) of macroalgae. For each year of the dataset, we



calculated the proportion of sites with more than 50% macroalgal cover (see also Bruno et al. 2009). Hughes et al. (2010) noted, however, that “dominance” may not be an appropriate metric, because an arbitrary abundance threshold, in this case 50% absolute cover, may be overly conservative. Because macroalgal cover is measured in terms of proportion of the total area rather than the area suitable for colonization (i.e., total area minus the area covered by sand), the usual threshold of 50% may underestimate dominance. We therefore also calculated the proportion of sites with more than 40% macroalgal cover, which would be equivalent to 50% cover where only 80% of the total area surveyed was available for colonization (i.e., average sand cover was 20%, a figure at the high end of our collective personal experience of benthic surveys).

Second, we examined relative dominance (or relative majority) by calculating the proportion of sites in each year with more macroalgae than coral. Both of these methods estimate the prevalence of macroalgal dominance, but they have four limitations. (1) They do not account for the fact that sites may have lost coral cover and/or gained macroalgal cover without having become dominated (in either absolute or relative terms) by the latter while they were monitored. (2) They do not effectively capture changes occurring at sites with naturally low coral cover and high macroalgal cover (see Vroom et al. [2006] for a Pacific example), which may have been that way historically due to regular perturbation. (3) They also do not capture seasonal or local variations in macroalgal cover (Lirman and Biber 2000). (4) Finally, they do not account for other classes of benthic organisms (octocorals, sponges, zoanthids, turfs, crustose coralline algae, etc.) that may have higher absolute cover than either corals or macroalgae or that may ascend to dominance on some temporal scale (e.g., Aronson et al. 2012, Ruzicka et al. 2013, Toth et al. 2014, Tsounis and Edmunds 2017).

Third, due to a paucity of data, we are unsure what the natural cover of coral and macroalgae was on undisturbed Caribbean coral reefs prior to the 1970s (Bruno et al. 2014, Eddy et al. 2018). Knowing this baseline metric would be helpful in interpreting change on reefs through time and developing quantitative targets for management and restoration. Some authors, however, have argued that coral and macroalgal cover by themselves are not reliable metrics of reef health and resilience and that cover only becomes a definitive indicator of phase shifts if the same site is monitored for multiple years (Hughes et al. 2010). To overcome this possible limitation, we examined site-specific ratios of coral to macroalgae at the start and end of each time-series to generate a more dynamic metric of dominance. We recorded the proportion of sites that had moved towards having proportionally less coral than macroalgae, as well as the specific year in which any change of relative dominance was observed at a site. We counted the number of sites in each year that had two attributes: (1) more coral than macroalgae (so they could have shifted); and (2) data for the previous year (so a shift could have been detected). We expressed that number of sites for each year as a proportion of all such sites, and then multiplied by the number of observed shifts (which was 49). This procedure distributed the shifts in proportion to the availability of sites that could shift.

The year of shift could only be identified at sites for which we had concurrent yearly estimates of both coral and macroalgal cover that were separated by no more than one year. Of the 208 sites in the database, 193 met this criterion. To evaluate whether more shifts were observed in each year than expected by chance alone, we used *G*-tests to compare the number of shifts recorded in any given year to the number expected given the total number of shifts observed across all years and the number of sites available to assess a shift in that year (expressed as the proportion of all sites across all years for which we had both coral and macroalgal cover data in that year and the previous year). To account for multiple tests, we adjusted the critical  $\alpha$  using the simple Bonferroni correction. The adjusted significance

threshold was  $\alpha_{\text{adj}} = 0.002$ . Finally, we recorded ‘phase-shift reversals,’ when a site that had exhibited greater cover of macroalgae than of coral, either at the start of the study or for at least two consecutive years during the study, shifted to having a higher cover of coral than of macroalgae at the end of its monitoring period.

## RESULTS

A total of 193 reef sites from 71 separate studies across the Caribbean reported concurrent cover of hard corals and macroalgae. The sites were distributed evenly around the Greater Caribbean (similar to the distribution shown in Gardner et al. [2003], with the addition of sites in St Lucia and Saba; Fig. 1). Overall, the time-series of coral and macroalgal cover spanned the years 1977 to 2001, although individual time-series were on average  $6 (\pm 4.7 \text{ SD})$  years long.

When coral-to-macroalgae phase shifts are defined by absolute (or majority) dominance—that is, shifts to  $\geq 50\%$  cover of macroalgae—the prevalence of phase shifts appears to have varied since 1977. Prior to 1981, all sites that were surveyed at the time ( $n = 19$ ) had less than 50% cover of macroalgae. The proportion of sites dominated by macroalgae peaked in 1987 and then decreased to fewer than 10% of sites since 1994 (Fig. 2). This change through time is related in part to the diminishing proportion in the dataset of Jamaican sites, which experienced a unique series of disturbances and ensuing ecological changes in the early 1980s (Côté et al. 2013). Setting the threshold for absolute dominance of macroalgae to 40% cover does not change the temporal pattern or proportion of sites dominated by macroalgal cover.

The prevalence of phase shifts is higher if phase shifts are defined as occurring when macroalgal cover exceeds coral cover (i.e., relative dominance of macroalgae). In the late 1970s, all sites exhibited higher cover of hard corals than of macroalgae (Fig. 2). Using this more liberal definition, by 1987 approximately half the sites had more macroalgae than coral, a proportion that has since remained relatively constant. The site-specific analysis reveals an even greater prevalence of phase shifts. Overall, 72% of individual sites moved towards proportionally less coral than macroalgae during their monitoring periods. The difference between coral and macroalgal cover declined until the early 1990s and has remained relatively stable since then at the majority of sites (Fig. 2; see similar analysis in Jackson et al. 2014).

A total of 49 coral-to-macroalgae shifts in relative dominance were detected. This total represents  $\sim 35\%$  of all sites that were dominated by coral at the start of their monitoring periods. Four shifts (8.2%) occurred because of coral loss with no change in macroalgal cover, 15 (30.6%) occurred because of macroalgal gain without coral loss, and 30 (61.2%) occurred owing to concomitant coral decline and macroalgal increase. The shifts occurred in 14 of the 25 years of the study period (Fig. 3). The years posting significantly more shifts to macroalgae than expected by chance were 1983, 1984, 1990 and 1998 (Fig. 3). Note that adjustment of  $\alpha$  to maintain a familywise error rate of 0.05 yielded the same results using the conservative simple-Bonferroni procedure and the less conservative sequential-Bonferroni and false-detection-rate procedures (Benjamini and Hochberg 1995). In 1983 and 1984, two-thirds of shifts were caused by macroalgal increase with no change in coral cover, whereas in the 1990 and 1998, 81% of shifts involved coral loss, either with or without macroalgal increases ( $G = 4.62$ ,  $df = 1$ ,  $P = 0.03$ ).

Of 57 sites that had more macroalgae than coral at the start of their monitoring periods, 52 (91%) had more macroalgae for the duration of monitoring; however, five reefs showed a clear reversal of the usual coral-to-macroalgae sequence of relative dominance.

These five reefs represent ~5% of all reefs that could have shifted to coral dominance: the 57 sites that were initially macroalgae-dominated, plus 49 sites that had shifted to more macroalgae during the time they were monitored. The reversals all occurred in the 1990s (1994, 1995, 1998 [2 sites], and 1999) and were geographically widespread (Mexico, Colombia, Saba [2 sites], and Puerto Rico). In three cases, the reversals were the result of decreased macroalgal cover only, whereas in two cases, macroalgae decreased and corals simultaneously increased.

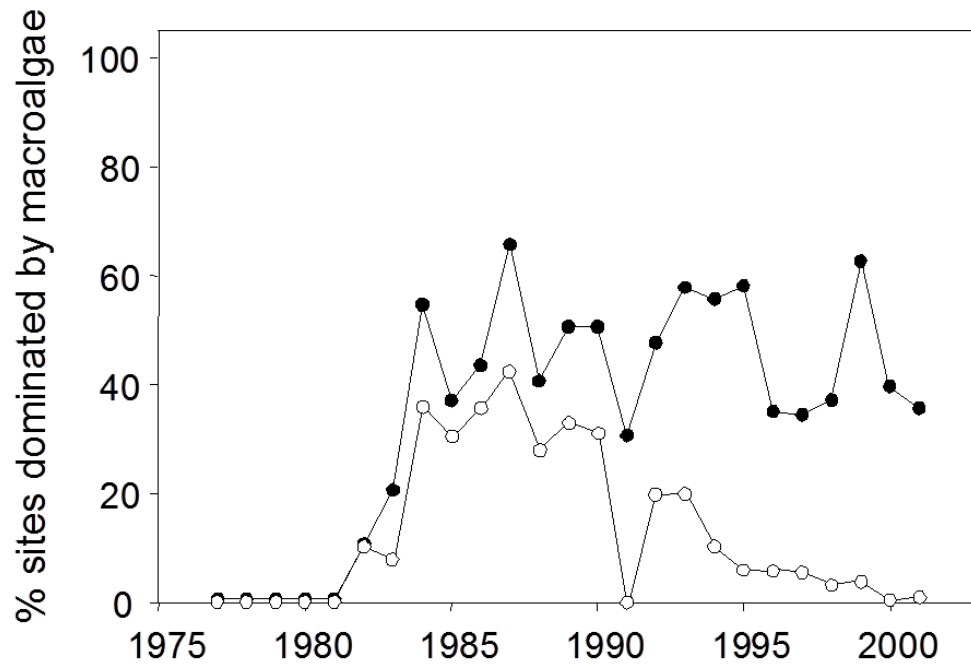

**Figure 2.** Prevalence of macroalgal dominance in Caribbean reef sites in each year between 1977 and 2001. Macroalgal dominance is defined either in absolute terms (>50% cover; open circles) or relative terms (higher macroalgal than coral cover; solid circles).



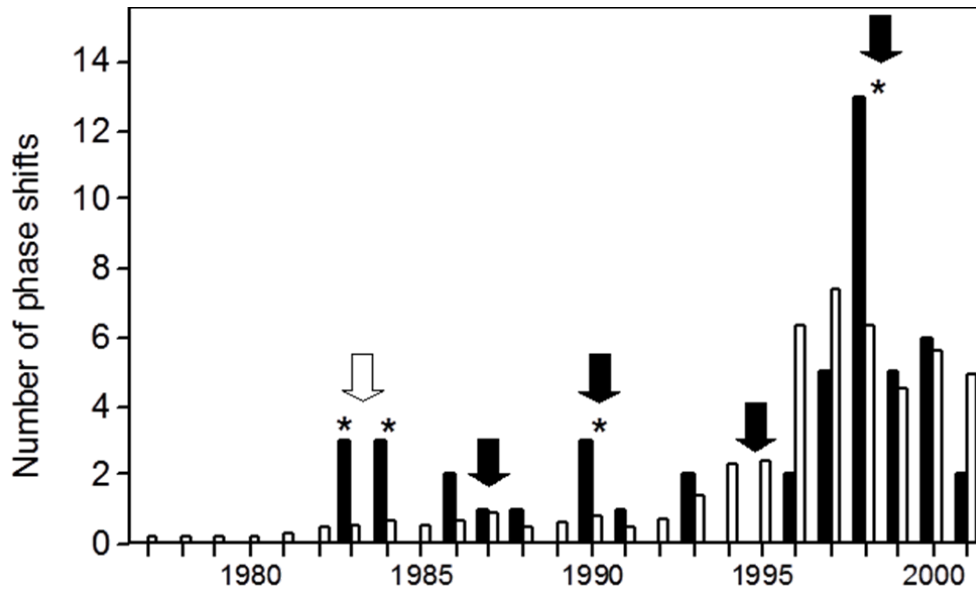

**Figure 3.** Numbers of coral-to-macroalgae shifts, expressed in relative terms, on Caribbean coral reefs (black bars) each year from 1977 to 2001. Also shown (white bars) are numbers of coral-to-macroalgae shifts expected to occur if these shifts simply occurred in proportion to the number of sites available to shift towards macroalgae dominance each year in the database. \* indicates a significantly greater number of observed shifts (G-tests, Bonferroni-corrected  $\alpha = 0.002$ ). The white arrow denotes the year of mass mortality of the sea urchin *Diadema antillarum*. The black arrows indicate years of mass coral bleaching, the most severe of which was 1998.

## DISCUSSION

Coral-reef degradation and phase shifts are highly variable processes that involve different combinations of coral loss and macroalgal gain in time and space (Bruno et al. 2009). Although we found that nearly three-quarters of reef sites across the Caribbean region changed in the general direction of having less coral and more macroalgae, our analysis also reveals that most Caribbean reefs were not overrun by macroalgae. After 1995, fewer than 10% of sites were dominated by macroalgae in absolute-majority terms. In this respect, our results are remarkably similar to the global analysis of Bruno et al. (2009), who came to a similar conclusion about the extent of macroalgal dominance in the Caribbean using different data.

The timing of shifts from coral to macroalgae sheds light on the causes of these ecological changes. The top-down model of reef decline, which suggests that macroalgal dominance resulted primarily from declines in grazing intensity, implies that the mass mortality of *Diadema antillarum* in 1983–1984 should have had a detectable effect on the timeline of coral–macroalgae shifts in the Caribbean. In 1983, a water-borne pathogen decimated populations of this important herbivore, causing the loss of ~93% of the *Diadema* throughout the region in less than one year (Lessios 1988, 2016). The mass mortality triggered cascading effects on the reef benthos, as well as on herbivorous and predatory fishes (Hughes et al. 1987, Robertson 1991). We found that in 1983 and 1984 more reefs exhibited shifts towards macroalgae than expected by chance alone, suggesting a regional link between decreased herbivory and increased macroalgal cover. During this two-year period, however, observed phase shifts were caused mainly by increases in macroalgae and

not decreases in coral cover. This result calls into question the claim of Jackson et al. (2001) that the *Diadema* pandemic was “the principal cause of coral mortality” throughout the Caribbean.

The early years of our time-series are heavily influenced by Jamaica. The independent contributions of reduced herbivory and coral mortality are, unfortunately, difficult to partition because other events immediately preceded and overlapped the loss of *Diadema* in Jamaica. Most notable were Hurricane Allen in 1980, which caused extensive coral mortality (Woodley et al. 1981), and subsequent losses of coral due to predation and white-band disease (Knowlton et al. 1981). Even in Jamaica, there appears to have been an interaction between coral mortality and reduced herbivory in the shift from coral to macroalgal dominance (Hughes 1994, Andres and Witman 1995, Precht and Aronson 2006). Jamaican reefs had much more coral than macroalgae until 1980, after which the relative difference in cover between these two benthic components began to decline markedly. By 1984, macroalgal cover exceeded coral cover on Jamaican reefs. The difference between macroalgal and coral cover peaked in 1992, with reefs having had on average 70% higher absolute cover of macroalgae than living coral. Corals recovered and macroalgae declined between 1992 and 1999, the last year of our dataset for Jamaica (Fig. 4). The pattern for other Caribbean reefs was superficially similar but quantitatively different. On non-Jamaican reefs, the difference between coral and macroalgae also declined from 1984 to 1994, but less-so, and remained relatively stable for the remainder of the time-series (Fig. 4).

At the regional scale, as in Jamaica significant losses of acroporid corals from white-band disease preceded and overlapped the loss of *Diadema* (Gladfelter 1982, Aronson and Precht 2001a, 2006, 2016). The years 1977–1983 showed significant losses of coral, with up to 40% decline in coral cover (Gardner et al. 2003). The timing of coral loss is consistent with white-band disease having been the primary cause of coral mortality in the Caribbean (Gardner et al. 2003, Aronson and Precht 2006, Alvarez-Filip et al. 2009, Schutte et al. 2010, Aronson and Precht 2016, Kuffner and Toth 2016). The loss of coral cover *per se* during this period was not coincident with widespread coral-to-macroalgae phase shifts, highlighting the importance of *Diadema* in ameliorating the impacts of macroalgae in the face of large-scale disturbances. Once *Diadema* were removed from the system in 1983–1984, however, much of the space made available by catastrophic mortality of the acroporids was rapidly colonized by macroalgae. The two other years, 1990 and 1998, in which there were significantly more coral-to-macroalgae shifts than expected—virtually all of which involved declines in coral cover—were years of mass coral-bleaching events in the Caribbean (McWilliams et al. 2005, Gill et al. 2006). Coral mortality was followed by macroalgal overgrowth of the dead-coral surfaces. The major coral-bleaching event in 1997–1998 resulted in widespread loss of coral, not only in the Caribbean (Aronson et al. 2002a) but also in other regions of the world (Lough 2000, Wilkinson 2002). The trend in coral cover followed a step-type function driven by coral disease and bleaching events as the proximal drivers of coral mortality (Aronson and Precht 2006). The ecological changes occurring in these years are, therefore, most consistent with the side-in model of reef degradation, which invokes coral mortality as the primary factor initiating phase shifts (Precht and Aronson 2006). Mass coral-bleaching events in 1987 and 1995 resulted in only localized areas of coral mortality (Lang et al. 1992, McField 1999, Ostrander et al. 2000). The latter two events were undetectable at the regional scale in our analysis (Fig. 3).

Our results suggest a limited role for changes in grazing pressure in driving phase shifts after 1990. Although we do not have site-specific estimates of herbivory, a regional analysis of Caribbean reef-fish abundance showed declines in herbivorous-fish density over

the duration of our study (Paddack et al. 2009). Since 1984 there has been no significant regional-scale recovery of *Diadema* (Hughes et al. 2010, Levitan et al. 2014, Rogers and Lorenzen 2016), suggesting that the intensity of herbivory has been declining on most Caribbean reefs. The temporal patterns in the prevalence of phase shifts—roughly stable or declining since the mid-1980s, depending on the definition of dominance (Fig. 2)—are not consistent with a regional reduction in herbivory. It is possible that reduced herbivory, caused by historical overfishing, set the stage for the extreme impact of coral mortality, as suggested by Jackson (2001, 2014). In a similar vein, Hughes et al. (2012) argued that the regime shifts observed across the Caribbean unfolded so slowly and gradually as to be imperceptible until a tipping point was reached. However, the non-random timing of phase-shifts across a broad gradient of fishing pressure and human influences (Kramer 2003, Newman et al. 2006), and the combined effects of two lethal, essentially concurrent epizootics with regional consequences unprecedented in at least the last several thousand years (Sheppard 1993, Knowlton 2001, Aronson et al. 2002b), argue against such undetected dynamics.

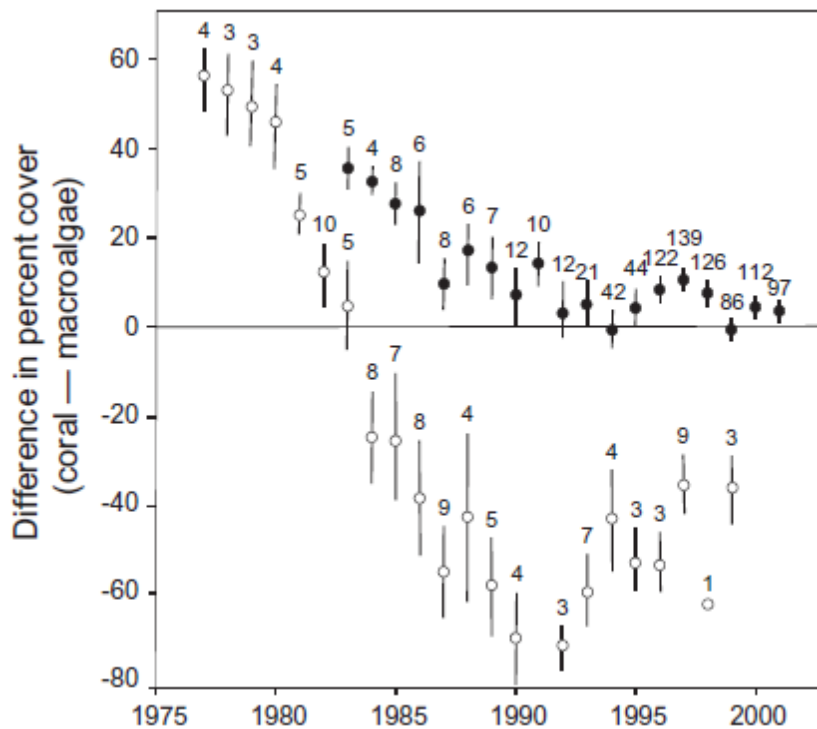

**Fig. 4.** Magnitudes of the difference between percent cover of live coral and macroalgae on Caribbean reefs in each year between 1977 and 2001. Means ( $\pm 1$  SE) are shown separately for Jamaican sites (open circles) and all other sites (filled circles). Positive values indicate that the cover of coral was higher than that of macroalgae. Numbers above the error bars show the number of sites contributing to each mean. Figure modified from original in Côté et al. (2014).

Coral-to-macroalgae phase shifts on Caribbean reefs have been postulated to represent transitions from one alternative stable state to another (Knowlton 1992). Whether the coral- and macroalgae-dominated states are stable alternatives, each of which resists conversion to the other, or whether the coral-to-macroalgae transition is a reversible phase

shift (Petraitis and Dudgeon 2004) is critical to determining the resilience of reef communities in the Caribbean (Scheffer and Carpenter 2003, Bellwood et al. 2004). Degraded reefs initially showed no evidence of recovery from a macroalgae-dominated state (e.g., Rogers and Miller 2006). Later literature, however, described a number of phase-shift reversals in the Caribbean including at highly degraded sites in Jamaica (Idjadi et al. 2006). We found evidence of shifts away from macroalgal dominance at five sites during the 1990s, where large changes in herbivory by fish were not reported. Since 2001, reduced macroalgal cover and then increased recruitment of juvenile corals, both associated with the local reappearance of *Diadema*, have occurred, first on Jamaican reefs (Edmunds and Carpenter 2001, Cho and Woodley 2002, Bechtel et al. 2006, Precht and Aronson 2006, Idjadi et al. 2010) and then on reefs elsewhere across the Caribbean (Macintyre et al. 2005, Carpenter & Edmunds 2006, Myhre and Acevedo-Gutiérrez 2007). A full reversal to the coral-dominated state was noted on one Jamaican reef (Idjadi et al. 2006, Precht and Aronson 2006, Crabbe 2009), where *Diadema* had recovered to half their pre-mortality densities (Edmunds and Carpenter 2001) without noticeable changes in fish populations (Woodley and Sary 2002, Hardt 2008) or improvements in water quality (Cho and Woodley 2002, Webber et al. 2005, Greenaway and Gordon-Smith 2006).

There is little evidence to support the notion of discrete, low coral/high macroalgae and high coral/low macroalgae alternative states; in our study, the abundances of hard corals and macroalgae exhibited a continuous, broadly negative relationship (see also Lowe et al. 2011). Reefs with little coral had highly variable amounts of macroalgae, just as reefs with little macroalgae varied greatly in coral cover (Fig. 5). It was more common for Caribbean reefs to shift from coral to macroalgal dominance, with 35% of sites that could do so having done so during the study period, than to shift in the reverse direction, with only 5% of eligible sites having done so. This asymmetry in the direction of shifts is more parsimoniously explained by (1) the relatively short time-series of our data set, (2) the catastrophic and escalating nature of recent disturbances, many of which have caused (and continue to cause) extensive coral mortality (Miller et al. 2009, Eakin et al. 2010, Precht et al. 2016), (3) the rapid colonization and turnover times of the replacement algal species (McCook et al. 2001), and (4) the slow natural succession of long-lived reef fauna following regional, catastrophic mortality of the major foundation species (*Acropora palmata* and *A. cervicornis*) and the keystone herbivore (*Diadema antillarum*)—than by resistance to recovery from the macroalgae-dominated state (Dudgeon et al. 2010). Clearly, if coral-mortality events become more frequent and more severe, the likelihood of complete recovery between disturbance events will diminish (see Palumbi et al. 2008).

We anticipate that if *Diadema* populations continue to increase across the region, so will the number of phase-shift reversals (Precht and Precht 2016; but see Levitan et al. 2014). Early evaluations suggest, however, that reversing phase shifts may depend on successfully reducing the causative stressors (Dudgeon et al. 2010) and having sufficient rates of activity by functional groups that play key roles in reversing the changes (McClanahan et al. 2011b, Francis et al. 2019). Given enough time and in the absence of additional, significant coral mortality, recovery of Caribbean coral populations seems plausible. Devising restoration and management programs that enhance or restore critical components of the ecosystem, reduce macroalgae, and promote the success of corals should foster resilience and accelerate recovery, at least locally (Mumby 2006, Newman et al. 2006, Precht and Aronson 2006, Hoegh-Guldberg et al. 2007, Furman and Heck 2009, Idjadi et al. 2010, Smith et al. 2010, Edwards et al. 2011, Sandin and McNamara 2012, Jackson 2014, Adam et al. 2014).

Evidence suggests, however, that overfishing is not the major threat to benthic assemblages on coral reefs, nor is the recovery of parrotfish the solution (Aronson and Precht

2006, Rotjan et al. 2006, Russ et al. 2015, Kuffner and Toth 2016, Precht and Precht 2016, Suchley et al. 2016, Bruno et al. 2019). For example, reefs in the Florida Keys, which have maintained relatively high populations of herbivorous fishes (Bohnsack et al. 1994, Alevizon and Porter 2014), should have exhibited considerably less coral loss than reported for the rest of the Caribbean region. Coral loss in Florida, however, was significantly greater than the Caribbean average throughout this period (Schutte et al. 2010), while coral recruit survival and reef recovery were limited (Toth et al. 2014, van Woesik et al. 2014). Protecting fish stocks does not necessarily reduce the cover of macroalgae, increase coral populations, or preserve or increase the topographic complexity that is critical to maintaining and increasing those fish stocks (McClanahan et al. 2011a, 2011b, Bood 2006, Idjadi et al. 2006, Coelho and Manfrino 2007, Kramer and Heck 2007, Ledlie et al. 2007, Mora 2008, Alvarez-Filip et al. 2009, Myers and Ambrose 2009, Stockwell et al. 2009, Selig and Bruno 2010, Alvarez-Filip et al. 2011, Huntington et al. 2011, Lowe et al. 2011, Żychaluk et al. 2012, Reyes-Bonilla et al. 2014, Toth et al. 2014, Cox et al. 2017, Bates et al. 2019).

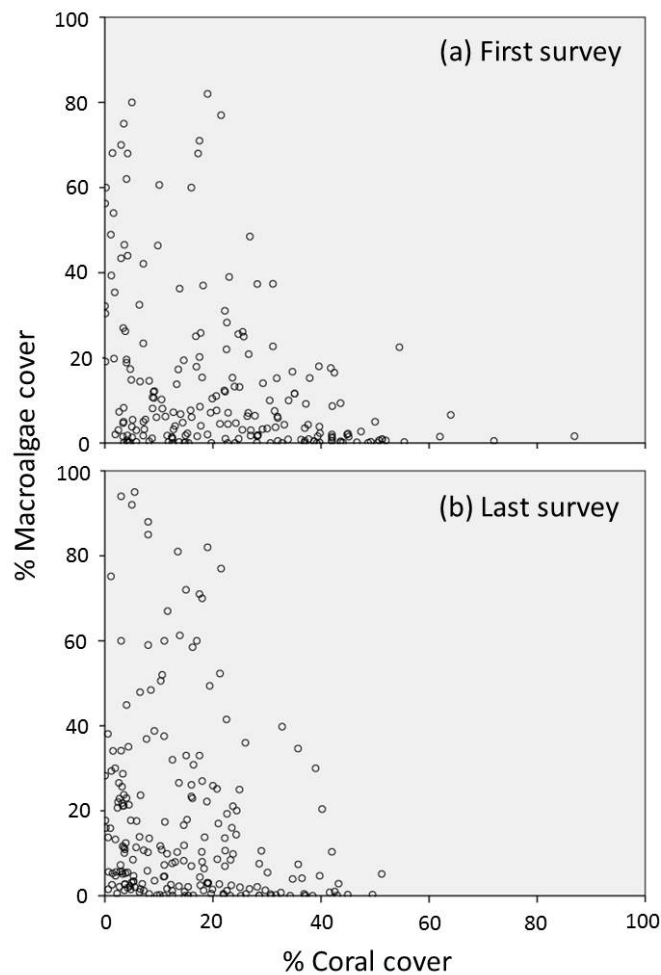

**Figure 5.** Relationship between macroalgal and coral cover on the reefs included in the study. Data are from the first (a) and last (b) survey of each reef only. The relationship between macroalgal and coral cover is virtually identical. Note the absence of two distinct clusters of reefs, one with high coral and low macroalgal cover and the other with low coral and high macroalgal cover, which would have been predicted by the hypothesis of alternative stable states.



## SUMMARY

The timing of macroalgal phase-shifts at the regional scale spanning the years 1977–2001 is most consistent with side-in model of reef degradation, which invokes coral mortality as a precursor to macroalgal takeover, because more shifts occurred after regional coral-mortality events than expected by chance. The implication of this conclusion is that regional causes of coral mortality far outweighed local causes. Why is this important? Reversing coral decline will depend on simultaneously addressing the proximal causes of regional mortality of reef-building corals: the local-scale manifestations of global climate change and other local causes (McClanahan 2002, Hughes et al. 2003, Buddemeier et al. 2004, Aronson and Precht 2006, 2016, Rogers 2008, Côté and Darling 2010, Hoegh-Guldberg and Bruno 2010, Selig et al. 2012, Birkeland et al. 2013, Bruno and Valdivia 2016, Bruno et al. 2019). If the side-in impacts of diseases, hurricanes and bleaching continue unabated (Veron et al. 2009, Eakin et al. 2010, Hoegh-Guldberg et al. 2011, Randall et al. 2014, Manzello 2015, Precht et al. 2016), regional-scale coral mortality will outpace local recovery, resulting in reefs that will look and function very differently from the way they do now (Carpenter et al. 2008, Burman et al. 2012, Smith et al. 2013, Kuffner et al. 2014, Aronson and Precht 2016, Kuffner and Toth 2016, Precht et al. 2016, Toth et al. 2019). Macroalgae-dominated reefs could then truly become the norm.

## ACKNOWLEDGEMENTS

We thank the many people who contributed unpublished data or manuscripts in press. Portions of this work were carried out under permits from the Florida Keys National Marine Sanctuary and the Belize Department of Fisheries. Thanks to John Bruno, Steven Miller, and Lauren Toth for commenting on an earlier version of this manuscript. This research was supported by the UK Natural Environment Research Council (TAG); the Tyndall Centre for Climate Change Research (IMC, JAG, ARW); the US National Science Foundation (OCE-1535007 to RBA); the National Geographic Society; NOAA's National Undersea Research Program, NOAA's Sanctuaries and Reserves Division, Coastal Ocean Program, and FKNMS (RBA and WFP); and the Natural Science and Engineering Research Council of Canada (IMC). This is contribution number 146 from the Institute for Research to Global Climate Change of the Florida Institute of Technology.

## REFERENCES

- Adam, T.C., D.E. Burkepile, B.I. Ruttenberg, and M.J. Paddock. 2015. Herbivory and the resilience of Caribbean coral reefs: knowledge gaps and implications for management. *Marine Ecology Progress Series* 520:1–20.
- Alevizon, W.S., and J.W. Porter. 2014. Coral loss and fish guild stability on a Caribbean coral reef: 1974–2000. *Environmental Biology of Fishes* 98:1035–1045.
- Alvarez-Filip, L.O., I.M. Côté, J.A. Gill, A.R. Watkinson, and N.K. Dulvy. 2011. Region-wide temporal and spatial variation in Caribbean reef architecture: is coral cover the whole story? *Global Change Biology* 17:2470–2477.
- Alvarez-Filip, L., N.K. Dulvy, J.A. Gill, I.M. Côté, and A.R. Watkinson. 2009. Flattening of Caribbean coral reefs: region-wide declines in architectural complexity. *Proceedings of the Royal Society London B: Biological Sciences* 276:3019–3025.

- Andres, N.G., and J.D. Witman. 1995. Trends in community structure on a Jamaican reef. *Marine Ecology Progress Series* 118:305–310.
- Aronson, R.B., P.J. Edmunds, W.F. Precht, D.W. Swanson, and D.R. Levitan. 1994. Large scale, long-term monitoring of Caribbean coral reefs: simple, quick, inexpensive techniques. *Atoll Research Bulletin* 421:1–19.
- Aronson, R.B., I.G. Macintyre, W.F. Precht, T.J.T. Murdoch, and C.M. Wapnick. 2002b. The expanding scale of species turnover events on coral reefs. *Ecological Monographs* 72:233–249.
- Aronson, R.B., and W.F. Precht. 2000. Herbivory and algal dynamics on the coral reef at Discovery Bay, Jamaica. *Limnology and Oceanography* 45:251–255.
- Aronson, R.B., and W.F. Precht. 2001a. White-band disease and the changing face of Caribbean coral reefs. *Hydrobiologia* 460:25–38.
- Aronson, R.B., and W.F. Precht. 2001b. Evolutionary paleoecology of Caribbean coral reefs. In: Allmon W.D., and D.J. Bottjer, editors. *Evolutionary paleoecology: the ecological context of macroevolutionary change*. Columbia University Press, New York. p 171–233.
- Aronson, R.B., and W.F. Precht. 2006. Conservation, precaution, and Caribbean reefs. *Coral Reefs* 25:441–450.
- Aronson R.B., and W.F. Precht. 2016. Physical and biological drivers of coral-reef dynamics. In: Hubbard D.K., C.S. Rogers, J.H., Lipps, and G.D., Stanley, Jr., editors. *Coral Reefs at the Crossroads. Coral Reefs of the World Vol. 6*. Springer-Verlag, New York. p 435–461.
- Aronson, R.B., W.F. Precht, I.G. Macintyre IG, and L.T. Toth. 2012. Catastrophe and the life span of coral reefs. *Ecology* 93:303–313.
- Aronson, R.B., W.F. Precht, M.A. Toscano, and K.H. Koltjes. 2002a. The 1998 bleaching event and its aftermath on a coral reef in Belize. *Marine Biology* 141:435–437.
- Bahr, K.D., Jokiel, P.L. and Toonen, R.J., 2015. The unnatural history of Kāneʻohe Bay: coral reef resilience in the face of centuries of anthropogenic impacts. *PeerJ* 3: p.e950. doi.org/10.7717/peerj.950
- Banner, A.H. 1974. Kaneohe Bay, Hawaii: urban pollution and a coral reef ecosystem. *Proceedings of the 2<sup>nd</sup> International Coral Reef Symposium, Brisbane* 2:685–702.
- Bates, A.E., R.S. Cooke, M.I. Duncan, G.J. Edgar, J.F. Bruno, L. Benedetti-Cecchi, I.M. Côté, J.S. Lefcheck, M.J. Costello, N. Barrett, and T.J. Bird. 2019. Climate resilience in marine protected areas and the ‘Protection Paradox’. *Biological Conservation* 236:305–314.
- Bechtel, J.D., P. Gayle, and L. Kaufman. 2006. The return of *Diadema antillarum* to Discovery Bay: patterns of distribution and abundance. *Proceedings of the 10<sup>th</sup> International Coral Reef Symposium, Okinawa* 1:367–375.
- Bellwood, D.R., T.P. Hughes, C. Folke, and M. Nyström. 2004. Confronting the coral reef crisis. *Nature* 429:827–833.
- Benjamini, Y., and Y. Hochberg. 1995. Controlling the false discovery rate: a practical and powerful approach to multiple testing. *Journal of the Royal Statistical Society B (Methodology)* 57:289–300.
- Biology Online. 2013. Definition of ecological dominance. [http://www.biology-online.org/dictionary/Dominant\\_species](http://www.biology-online.org/dictionary/Dominant_species)
- Birkeland, C., M.W. Miller, G.A. Piniak, C.M. Eakin, M. Weijerman, P. McElhany, M. Dunlap, and R.E. Brainard. 2013. Safety in numbers? Abundance may not safeguard corals from increasing carbon dioxide. *BioScience* 63:967–974.
- Birrell, C.L., L.J. McCook, and B.L. Willis. 2005. Effects of algal turfs and sediment on coral settlement. *Marine Pollution Bulletin* 51:408–414.

- Birrell, C.L., L.J. McCook, B.L. Willis, and G.A. Diaz-Pulido. 2008. Effects of benthic algae on the replenishment of corals and the implications for the resilience of coral reefs. *Oceanography and Marine Biology: An Annual Review* 46:25–64.
- Bohnsack, J.A., D.E. Harper, and D.B. McClellan. 1994. Fisheries trends from Monroe County, Florida. *Bulletin of Marine Science* 54:982–1018.
- Bood, N.D. 2006. Recovery and resilience of coral assemblages on managed and unmanaged reefs in Belize: a long-term study. MS Thesis. Mobile: University of South Alabama
- Box, S.J., and P.J. Mumby. 2007. Effect of macroalgal competition on growth and survival of juvenile Caribbean corals. *Marine Ecology Progress Series* 342:139–149.
- Bruno, J.F., I.M. Côté, and L.T. Toth. 2019. Climate change, coral loss, and the curious case of the parrotfish paradigm: Why don't marine protected areas improve reef resilience? *Annual Review of Marine Science* 11:307–334.
- Bruno, J.F., W.F. Precht, P.S. Vroom, and R.B. Aronson. 2014. Coral reef baselines: how much macroalgae is natural? *Marine Pollution Bulletin* 80:24–29.
- Bruno, J.F., and E.R. Selig. 2007. Regional decline of coral cover in the Indo-Pacific: Timing, extent, and subregional comparisons. *PLoS ONE* 2:e711; doi.org/10.1371/journal.pone.0000711.
- Bruno, J.F., H. Sweatman, W.F. Precht, E.R. Selig, and V.G.W. Schutte. 2009. Assessing evidence of phase shifts from coral to macroalgal dominance on coral reefs. *Ecology* 90:1478–1484.
- Bruno, J.F. and A. Valdivia. 2016. Coral reef degradation is not correlated with local human population density. *Scientific Reports* 6:29778; doi:10.1038/srep29778.
- Buddemeier, R.W., J.A. Kleypas JA, and R.B. Aronson. 2004. Coral reefs and global climate change: potential contributions of climate change to stresses on coral reef ecosystems. Arlington, Virginia: Pew Center on Global Climate Change, [http://www.c2es.org/docUploads/Coral\\_Reefs.pdf](http://www.c2es.org/docUploads/Coral_Reefs.pdf)
- Burman, S.G., R.B. Aronson, and R. van Woesik. 2012. Biotic homogenization of coral assemblages along the Florida reef tract. *Marine Ecology Progress Series* 467:89–96.
- Carpenter, R.C., and P.J. Edmunds. 2006. Local and regional scale recovery of *Diadema* promotes recruitment of scleractinian corals. *Ecology Letters* 9:268–277.
- Carpenter K.E. M. Abra, G. Aeby, R.B. Aronson, S. Banks, A. Bruckner, A. Chiriboga, J. Cortes, J.C., Delbeek, L. DeVantier, G.J. Edgar, A.J. Edwards, D. Fenner, H.M. Guzman, B.W. Hoeksema, G. Hodgson, O. Johan, W.Y. Licuanan, S.R. Livingstone, E.R. Lovell, J.A. Moore, D.O. Obura, D. Ochavillo, B.A. Polidoro, W.F. Precht, M.C. Quibilan, C. Reboton, Z.T. Richards, A.D. Rogers, J. Sanciangco, A. Sheppard, C. Sheppard, J. Smith, S. Stuart, E. Turak, J.E.N. Veron, C. Wallace, E. Weil, and E. Wood. 2008. One-third of reef-building corals face elevated extinction risk from climate change and local impacts. *Science* 321:560–563.
- Cho, L.L., and J.D. Woodley. 2002. Recovery of reefs at Discovery Bay, Jamaica and the role of *Diadema antillarum*. *Proceedings of the 9<sup>th</sup> International Coral Reef Symposium, Bali* 1:331–338.
- Coelho, V.R., and C. Manfrino. 2007. Coral community decline at a remote Caribbean island: marine no-take reserves are not enough. *Aquatic Conservation—Marine Freshwater Ecosystems* 17:666–685.
- Côté, I.M., and E.S. Darling. 2010. Rethinking ecosystem resilience in the face of climate change. *PLoS Biology* 8:e1000438; doi:10.1371/journal.pbio.1000438 .
- Côté, I.M., J.A. Gill, T.A. Gardner, and A.R. Watkinson. 2005. Measuring coral reef decline through meta-analyses. *Philosophical Transactions of the Royal Society of London B* 360:385–395.

- Côté, I.M., W.F. Precht, R.B. Aronson, and T.A. Gardner. 2013. Is Jamaica a good model for understanding Caribbean coral reef dynamics? *Marine Pollution Bulletin* 76:28–31.
- Cox, C., A. Valdivia, M. McField, K. Castillo, and J.F. Bruno. 2017. Establishment of marine protected areas alone does not restore coral reef communities in Belize. *Marine Ecology Progress Series* 563:65–79.
- Crabbe, M.J.C. 2009. Scleractinian coral population size structures and growth rates indicate coral resilience on the fringing reefs of North Jamaica. *Marine Environmental Research* 67:189–198.
- Done, T.J. 1992. Phase shifts in coral reef communities and their ecological significance. *Hydrobiologia* 247:121–132.
- Dudgeon, S.R., R.B. Aronson, J.F. Bruno, and W.F. Precht. 2010. Phase shifts and stable states on coral reefs. *Marine Ecology Progress Series* 413:201–216.
- Dustan, P., and J. C. Halas. 1987. Changes in the reef-coral community of Carysfort Reef, Key Largo, Florida: 1974 to 1982. *Coral Reefs* 6:91–106.
- Eakin, C.M., J.A. Morgan, S.F. Heron, S. Smith, G. Liu, L. Alvarez-Filip, B. Baca, E. Bartels, C. Bastidas, C. Bouchon, M. Brandt, A.W. Bruckner, L. Bunkley-Williams, A. Cameron, B.D. Causey, M. Chiappone, T.R.L. Christensen, M.J.C. Crabbe, O. Day, E. de la Guardia, G. Díaz-Pulido, D. DiResta, D.L. Gil-Agudelo, D.S. Gilliam, R.N. Ginsburg, S. Gore, H.M. Guzmán, J.C. Hendee, E.A. Hernández-Delgado, E. Husain, C.F.G. Jeffrey, R.J. Jones, E. Jordán-Dahlgren, L.S. Kaufman, D.I. Kline, P.A. Kramer, J.C. Lang, D. Lirman, J. Mallela, C. Manfrino, J-P. Maréchal, K. Marks, J. Mihaly, W.J. Miller, E.M. Mueller, E.M. Muller, C.A. Orozco Toro, H.A. Oxenford, D. Ponce-Taylor, N. Quinn, K.B. Ritchie, S. Rodríguez, A. Rodríguez Ramírez, S. Romano, J.F. Samhuri, J.A. Sánchez, G.P. Schmahl, B.V. Shank, W.J. Skirving, S.C.C. Steiner, E. Villamizar, S.M. Walsh, C. Walter, E. Weil, E.H. Williams, K. Woody Roberson, and Y. Yusuf. 2010. Caribbean corals in crisis: record thermal stress, bleaching, and mortality in 2005. *PLoS ONE* 2010 5:e13969; doi.org/10.1371/journal.pone.0013969.
- Eddy, T.D., W.W. Cheung, and J.F. Bruno. 2018. Historical baselines of coral cover on tropical reefs as estimated by expert opinion. *PeerJ* 6:p.e4308. <https://doi.org/10.7717/peerj.4308>
- Edmunds, P.J., and R.C. Carpenter. 2001. Recovery of *Diadema antillarum* reduces macroalgal cover and increases abundance of juvenile corals on a Caribbean reef. *Proceedings of the National Academy of Sciences USA* 98:5067–5071.
- Edwards, H.J., I.A. Elliott, C.M. Eakin, A. Irikawa, J.S. Madin, M. McField, J.A. Morgan, R. van Woesik, and P.J. Mumby. 2011. How much time can herbivore protection buy for coral reefs under realistic regimes of hurricanes and coral bleaching? *Global Change Biology* 17:2033–2048.
- Francis, F.T., K. Filbee-Dexter, H.F. Yan, H.F. and I.M. Côté. 2019. Invertebrate herbivores: Overlooked allies in the recovery of degraded coral reefs? *Global Ecology and Conservation* p.e00593. <https://doi.org/10.1016/j.gecco.2019.e00593>
- Furman, B.T., and K.L. Heck. 2008. Effects of nutrient enrichment and grazers on coral reefs: an experimental assessment. *Marine Ecology Progress Series* 363:89–101.
- Furman, B., and K.L. Heck. 2009. Differential impacts of echinoid grazers on coral recruitment. *Bulletin of Marine Science* 85:121–132.
- Gardner, T.A., I.M. Côté, J.A. Gill, A. Grant, and A.R. Watkinson. 2003. Long-term region-wide declines in Caribbean corals. *Science* 301:958–960.
- Gardner, T.A., I.M. Côté, J.A. Gill, A. Grant, and A.R. Watkinson. 2005. Hurricanes and Caribbean coral reefs: immediate impacts, recovery trajectories, and contribution to long-term coral decline. *Ecology* 86:174–184.



- Gill, J.A., A.R. Watkinson, J.P. McWilliams, and I.M. Côté. 2006. Opposing forces of aerosol cooling and El Niño drive coral bleaching on Caribbean reefs. *Proceedings of the National Academy of Sciences USA* 103:18870–18873.
- Gladfelter, W.B. 1982. White band disease in *Acropora palmata*: implications for the structure and growth of shallow reefs. *Bulletin of Marine Science* 32:639–643.
- Greenaway, A.M., and D. Gordon-Smith. 2006. The effects of rainfall on the distribution of inorganic nitrogen and phosphorus in Discovery Bay, Jamaica. *Limnology and Oceanography* 51:2206–2220.
- Hardt, M.J. 2008. Lessons from the past: the collapse of Jamaican coral reefs. *Fish and Fisheries* 10:1–16.
- Hoegh-Guldberg, O., and J.F. Bruno. 2010. The impact of climate change on the world's marine ecosystems. *Science* 328:1523–1528.
- Hoegh-Guldberg, O., J.C. Ortiz, and S. Dove. 2011. The future of coral reefs. *Science* 334:1494–1495.
- Hughes, T.P. 1994. Catastrophes, phase-shifts, and large-scale degradation of a Caribbean coral reef. *Science* 265:1547–1551.
- Hughes, T.P., A.H. Baird, D.R. Bellwood, M. Card, S.R. Connolly, C. Folke, R. Grosberg, O. Hoegh-Guldberg, J.B.J. Jackson, J. Kleypas, J.M. Lough, P. Marshall, M. Nystrom, S.R. Palumbi, J.M. Pandolfi, B. Rosen, and J. Roughgarden. 2003. Climate change, human impacts, and the resilience of coral reefs. *Science* 301:929–933.
- Hughes, T.P., N.A.J. Graham, J.B.C. Jackson, P.J. Mumby, R.S. Steneck. 2010. Rising to the challenge of sustaining coral reef resilience. *Trends in Ecology and Evolution* 25:633–642.
- Hughes, T.P., C. Linares, V. Dakos, I.A. van de Leemput, and E.H. van Nes. 2012. Living dangerously on borrowed time during slow, unrecognized regime shifts. *Trends in Ecology and Evolution* 28:149–155.
- Hughes, T.P., D.C. Reed, and M.J. Boyle. 1987. Herbivory on coral reefs: community structure following mass mortalities of sea urchins. *Journal of Experimental Marine Biology and Ecology* 113:39–59.
- Hughes, T.P., A.M. Szmant, R. Steneck, R. Carpenter, and S. Miller. 1999. Algal blooms on coral reefs: what are the causes? *Limnology and Oceanography* 44:1583–1586.
- Hunter, C.L. and C.W. Evans. 1995. Coral reefs in Kaneohe Bay, Hawaii: two centuries of western influence and two decades of data. *Bulletin of Marine Science* 57:501–515.
- Huntington, B.E., M. Karnauskas, and D. Lirman. 2011. Corals fail to recover at a Caribbean marine reserve despite ten years of reserve designation. *Coral Reefs* 30:1077–1085.
- Idjadi, J.A., R.N. Haring, and W.F. Precht. 2010. Recovery of the sea urchin *Diadema antillarum* promotes scleractinian coral growth and survivorship on shallow Jamaican reefs. *Marine Ecology Progress Series* 403:91–100.
- Idjadi, J.A., S.C. Lee, J.F. Bruno, W.F. Precht, L. Allen-Requa, and P.J. Edmunds. 2006. Rapid phase-shift reversal on a Jamaican coral reef. *Coral Reefs* 25:209–211.
- Jackson, J.B.C. 2001. What was natural in the coastal oceans? *Proceedings of the National Academy of Sciences USA* 98:5411–5418.
- Jackson, J.B.C. 2014. Executive summary. In: Jackson JBC, Donovan MK, Cramer KL, Lam VV, editors. Status and Trends of Caribbean Coral Reefs: 1970–2012. *Global Coral Reef Monitoring Network*, IUCN, Gland, Switzerland.
- Jackson, J.B.C., M.K. Donovan, K.L. Cramer, V.V. Lam (editors). 2014. Status and Trends of Caribbean Coral Reefs: 1970–2012. *Global Coral Reef Monitoring Network*, IUCN, Gland, Switzerland.
- Jackson, J.B.C., M.X. Kirby, W.H. Berger, K.A. Bjorndal, L.A. Botsford, B.J. Bourque, R.H. Bradbury, R. Cooke, J. Erlandson, J.A. Estes, T. Cooke, T.P. Hughes, S. Kidwell, C.B.



- Lange, H.S. Lenihan, J.M. Pandolfi, C.H. Peterson, R.S. Steneck, M.J. Tegner, and R.R. Warner. 2001. Historical overfishing and the recent collapse of coastal ecosystems. *Science* 293:629–638.
- Jorissen H, C. Skinner, R. Osinga, D. de Beer, and M.M. Nugues. 2016. Evidence for water-mediated mechanisms in coral–algal interactions. *Proceedings of the Royal Society of London B* 283:20161137. doi.org/10.1098/rspb.2016.1137
- Kaufman, L.S. 1983. Effects of Hurricane Allen on reef fish assemblages near Discovery Bay, Jamaica. *Coral Reefs* 2:43–47.
- Knowlton, N. 1992. Thresholds and multiple stable states in coral reef community dynamics. *American Zoologist* 32:674–682.
- Knowlton, N. 2001. Sea urchin recovery from mass mortality: New hope for Caribbean coral reefs? *Proceedings of the National Academy of Sciences USA* 98:4822–4824.
- Knowlton, N., J.C. Lang, M.C. Rooney, and P.A. Clifford. 1981. Evidence for delayed mortality in hurricane-damaged Jamaican staghorn corals. *Nature* 294:251–252.
- Kramer, K.L., and K.L. Heck Jr. 2007. Top-down trophic shifts in Florida Keys patch reef marine protected areas. *Marine Ecology Progress Series* 349:111–123.
- Kramer, P.A. 2003. Synthesis of coral reef health indicators for the western Atlantic: Results of the AGRRA program (1997–2000). *Atoll Research Bulletin* 496:1–57.
- Kuffner, I.B., B.H. Lidz, J.H. Hudson, and J.S. Anderson. 2014. A century of ocean warming on Florida Keys coral reefs: historic in situ observations. *Estuaries and Coasts* 38:1085–1096.
- Kuffner, I. B., and L.T. Toth, 2016. A geological perspective on the degradation and conservation of western Atlantic coral reefs. *Conservation Biology* 30:706–715.
- Kuffner, I.B., L.J. Walters, M.A. Becerro, V.J. Paul, R. Ritson-Williams, and K.S. Beach. 2006. Inhibition of coral recruitment by macroalgae and cyanobacteria. *Marine Ecology Progress Series* 323:107–117.
- Lang, J.C., H.R. Lasker, E.H. Gladfelter, P. Hallock, W.C. Jaap, F.J. Losada, and R.G. Muller. 1992. Spatial and temporal variability during periods of “recovery” after mass bleaching on western Atlantic coral reefs. *American Zoologist* 32:696–706.
- Lapointe, B.E. 1997. Nutrient thresholds for bottom up control of macroalgal blooms on coral reefs in Jamaica and southeast Florida. *Limnology and Oceanography* 42:1119–1131.
- Ledlie, M.H., N.A.J. Graham, J.C. Bythell, S.K. Wilson, S. Jennings, N.V.C. Polunin, and J. Hardcastle. 2007. Phase shifts and the role of herbivory in the resilience of coral reefs. *Coral Reefs* 26:641–653.
- Lessios, H.A. 1988. Mass mortality of *Diadema antillarum* in the Caribbean: what have we learned? *Annual Review of Ecology and Systematics* 19:371–393.
- Lessios, H.A. 2016. The great *Diadema antillarum* die-off: 30 years later. *Annual Review of Marine Science* 8:267–283.
- Levitan, D.R., P.J. Edmunds, and K.E. Levitan. 2014. What makes a species common? No evidence of density-dependent recruitment or mortality of the sea urchin *Diadema antillarum* after the 1983–1984 mass mortality. *Oecologia* 175:117–128.
- Liddell, W.D., and S.L. Ohlhorst. 1992. Ten years of disturbance and change on a Jamaican fringing reef. *Proceedings of the 7th International Coral Reef Symposium, Guam* 1:144–150.
- Lirman, D. 2001. Competition between macroalgae and corals: effects of herbivore exclusion and increased algal biomass on coral survivorship and growth. *Coral Reefs* 19:392–399.
- Lirman, D., and P. Biber. 2000. Seasonal dynamics of macroalgal communities of the northern Florida Reef Tract. *Botanica Marina* 43:305–314.

- Lirman, D., and P. Fong. 2007. Is proximity to land-based sources of coral stressors an appropriate measure of risk to coral reefs? An example from the Florida Reef Tract. *Marine Pollution Bulletin* 54:779–791.
- Lirman, D, S. Schopmeyer, D. Manzello, L.J. Gramer, W.F. Precht, F. Muller-Karger, K. Banks, B. Barnes, E. Bartels, A. Bourque, J. Byrne, S. Donahue, J. Duquesnel, L. Fisher, D. Gilliam, J. Hendee, M. Johnson, K. Maxwell, E. McDevitt, J. Monty, D. Rueda, R. Ruzicka, and S. Thanner. 2011. Severe 2010 cold-water event caused unprecedented mortality to corals of the Florida Reef Tract and reversed previous survivorship patterns. *PLoS ONE* 6:e23047; doi:10.1371/journal.pone.0023047.
- Littler, M.M., D.S. Littler, and B.L. Brooks. 2006. Harmful algae on tropical coral reefs: bottom-up eutrophication and top-down herbivory. *Harmful Algae* 5:565–585.
- Lough, J.M. 2000. 1997–98: Unprecedented thermal stress to coral reefs? *Geophysical Research Letters* 27:3901–3904.
- Lowe, P.K., J.F. Bruno, E.R. Selig, and M. Spencer. 2011. Empirical models of transitions between coral reef states: effects of region, protection, and environmental change. *PLoS ONE* 6:e26339; doi.org/10.1371/journal.pone.0026339.
- Macintyre, I.G., P.W. Glynn, and F. Hinds. 2005. Evidence of the role of *Diadema antillarum* in the promotion of coral settlement and survivorship. *Coral Reefs* 24:273.
- Manzello, D.P. 2015. Rapid recent warming of coral reefs in the Florida Keys. *Scientific Reports* 5:16762; doi:10.1038/srep16762.
- McClanahan, T.R. 1999. Predation and the control of the sea urchin *Echinometra viridis* and fleshy algae in the patch reefs of Glovers Reef, Belize. *Ecosystems* 2:511–523.
- McClanahan, T.R. 2002. The near future of coral reefs. *Environmental Conservation* 29:460–483.
- McClanahan, T.R., B.E. Huntington, and B. Cokos. 2011a. Coral responses to macroalgal reduction and fisheries closure on Caribbean patch reefs. *Marine Ecology Progress Series* 437:89–102.
- McClanahan, T.R., N.A. Muthiga, and R.A. Coleman. 2011b. Testing for top-down control: can post-disturbance fisheries closures reverse algal dominance? *Aquatic Conservation—Marine and Freshwater Ecosystems* 21:658–675.
- McClanahan, T., N. Polunin, and T. Done. 2002. Ecological states and the resilience of coral reefs. *Conservation Ecology* 6:18. <http://www.consecol.org/vol6/iss2/art18/>.
- McClanahan, T.R., E. Sala, P.J. Mumby, and S. Jones. 2004. Phosphorus and nitrogen enrichment do not enhance brown frondose “macroalgae.” *Marine Pollution Bulletin* 48:196–199.
- McCook, L.J. 1999. Macroalgae, nutrients and phase shifts on coral reefs: scientific issues and management consequences for the Great Barrier Reef. *Coral Reefs* 18:357–367.
- McCook, L., J. Jompa, and G. Diaz-Pulido. 2001. Competition between corals and algae on coral reefs: a review of evidence and mechanisms. *Coral Reefs* 19:400–417.
- McField, M.D. 1999. Coral response during and after mass bleaching in Belize. *Bulletin of Marine Science* 64:155–172.
- McManus, J.W., and J.F. Polsenberg. 2004. Coral-algal phase shifts on coral reefs: ecological and environmental aspects. *Progress in Oceanography* 60:263–279.
- McWilliams, J.P., I.M. Côté, J.A. Gill, W.J. Sutherland, and A.R. Watkinson. 2005. Accelerating impacts of temperature-induced coral bleaching in the Caribbean. *Ecology* 86:2055–2060.
- Miller, J., E. Muller, C. Rogers, R. Waara, A. Atkinson, M. Patterson, and B. Witcher. 2009. Coral disease following massive bleaching in 2005 causes 60% decline in coral cover on reefs in the US Virgin Islands. *Coral Reefs* 28:925–937.

- Miller, M.W., M.E. Hay, S.L. Miller, D. Malone, E.E. Sotka, and A.M. Szmant. 1999. Effects of nutrients versus herbivores on reef algae: a new method for manipulating nutrients on coral reefs. *Limnology and Oceanography* 44:1847–1861.
- Mora, C. 2008. A clear human footprint in the coral reefs of the Caribbean. *Proceedings Royal Society London B: Biological Sciences* 275:767–773.
- Mumby, P.J. 2006. The impact of exploiting grazers (Scaridae) on the dynamics of Caribbean coral reefs. *Ecological Applications* 16:747–769.
- Mumby, P.J. 2009. Phase shifts and the stability of macroalgal communities on Caribbean coral reefs. *Coral Reefs* 28:761–777.
- Mumby, P.J., J.D. Hedley, K. Žychaluk, A.B. Harborne, and P.G. Blackwell. 2006. Revisiting the catastrophic die-off of the urchin *Diadema antillarum* on Caribbean coral reefs: Fresh insights on resilience from a simulation model. *Ecological Modeling* 196:131–148.
- Mumby, P.J., A. Hastings, and H.J. Edwards. 2007. Thresholds and the resilience of Caribbean coral reefs. *Nature* 450:98–101.
- Mumby, P.J., and R.S. Steneck. 2008. Coral reef management and conservation in light of rapidly emerging ecological paradigms. *Trends in Ecology and Evolution* 23:555–563.
- Myers, M.R., and R.F. Ambrose. 2009. Differences in benthic cover inside and outside marine protected areas on the Great Barrier Reef: influence of protection or disturbance history? *Aquatic Conservation—Marine Freshwater Ecosystems* 19:736–747.
- Myhre, S., and A. Acevedo-Gutiérrez. 2007. Recovery of sea urchin *Diadema antillarum* populations is correlated to increased coral and reduced macroalgal cover. *Marine Ecology Progress Series* 329:205–210.
- Newman, M.J.H., G.A. Paredes, E. Sala, and J.B.C. Jackson. 2006. Structure of Caribbean coral reef communities across a large gradient of fish biomass. *Ecology Letters* 9:1216–1227.
- Norström, A.V., M. Nyström, J. Lokrantz, and C. Folke. 2009. Alternative states on coral reefs: beyond coral–macroalgal phase shifts. *Marine Ecology Progress Series* 376:295–306.
- Nugues, M.M. and R.P.M. Bak. 2006. Differential competitive abilities between Caribbean coral species and a brown alga: a year of experiments and a long-term perspective. *Marine Ecology Progress Series* 315:75–86.
- Nugues, M.M., and R.P.M. Bak. 2008. Long-term dynamics of the brown macroalga *Lobophora variegata* on deep reefs in Curacao. *Coral Reefs* 27:389–393.
- Ogden, J.C. 1995. Coral reef decline in the Caribbean region. *Proceedings of the 2<sup>nd</sup> European Regional Meeting of the International Society for Reef Studies, Publications du Service Géologique du Luxembourg XXIX*. p 224.
- Ostrander, G.K., K.M. Armstrong, E.T. Knobbe, D. Gerace, and E.P. Scully. 2000. Rapid transition in the structure of a coral reef community: the effects of coral bleaching and physical disturbance. *Proceedings of the National Academy of Sciences USA* 97:5297–5302.
- Paddack, M., J. Reynolds, C. Aguilar, R. Appledorn, J. Beets, E.W. Burkett, P.M. Chittaro, K. Clarke, R. Esteves, A.C. Fonseca, G.E. Forrester, A.M. Friedlander, J. García-Sais, G. González-Sansón, L.K.B. Jordan, D.B. McClellan, M.W. Miller, P.P. Molloy, P.J. Mumby, I. Nagelkerken, M. Nemeth, R. Navas-Camacho, J. Pitt, N.V.C. Polunin, M.C. Reyes-Nivia, D.R. Robertson, A. Rodríguez-Ramírez, E. Salas, S.R. Smith, R.E. Spieler, M.A. Steele, I.D. Williams, C.L. Wormald, A.R. Watkinson AR, and I.M. Côté. 2009. Recent region-wide declines in Caribbean reef fish abundance. *Current Biology* 19:590–595.

- Paine, R.T., M.J. Tegner, and E.A. Johnson. 1998. Compounded perturbations yield ecological surprises. *Ecosystems* 1:535–545.
- Palumbi, S.R., K.L. McLeod, K.L. and D. Grünbaum, D. 2008. Ecosystems in action: lessons from marine ecology about recovery, resistance, and reversibility. *BioScience* 58:33–42.
- Pandolfi, J.M., Bradbury, E. Sala, T.P. Hughes, K.A. Bjorndal, R.G. Cooke, D. McArdle, L. McClenachan, M.J.H. Newman, G. Paredes, R.R. Warner, and J.B.C. Jackson. 2005. Are U.S. coral reefs on the slippery slope to slime? *Science* 307:1725–1726.
- Pauly, D., V. Christiansen, J. Dalsgaard, R. Froese, and F. Torres Jr. 1998. Fishing down marine food webs. *Science* 279:860–863.
- Petraitis, P.S., and S.R. Dudgeon. 2004. Detection of alternative states in marine communities. *Journal of Experimental Marine Biology and Ecology* 300:343–371.
- Precht L.L., and Precht W.F. The sea urchin *Diadema antillarum* – keystone herbivore or redundant species? *PeerJ PrePrints* 3:e1951; doi.org/10.7287/peerj.preprints.1565v2.
- Precht, W.F., and R.B. Aronson. 2006. Death and resurrection of Caribbean coral reefs: a palaeoecological approach. In: Côté I.M., and Reynolds J.D., editors. Coral reef conservation. Cambridge University Press, Cambridge, UK. p 40–77.
- Precht W.F., B.E. Gintert, M.L. Robbart, R. Fura, and R. van Woesik. 2016. Unprecedented disease-related coral mortality in southeastern Florida. *Scientific Reports* 6:31374; doi:10.1038/srep31374.
- Precht, W.F., and S.L. Miller. 2007. Ecological shifts along the Florida Reef Tract: the past is a key to the future. In: Aronson RB, editor. Geological approaches to coral reef ecology. Springer, New York, USA. p 237–312.
- Quinn, J.F., and A.E. Dunham. 1983. On hypothesis testing in ecology and evolution. *American Naturalist* 122:602–617.
- Randall, C.J., A.G. Jordán-Garza, E.M. Muller, and R. van Woesik. 2014. Relationships between the history of thermal stress and the relative risk of diseases of Caribbean corals. *Ecology* 95:1981–1994.
- Reyes-Bonilla H., M. Millet-Encalada, and L. Álvarez-Filip. 2014. Community structure of scleractinian corals outside protected areas in Cozumel Island, Mexico. *Atoll Research Bulletin* 601:1–13.
- Ritson-Williams, R., S.N. Arnold, N.D. Fogarty, R.S. Steneck, M.J. Vermeij, and V.J. Paul. 2009. New perspectives on ecological mechanisms affecting coral recruitment on reefs. *Smithsonian Contributions to the Marine Sciences* 38:437–457.
- Robertson, D.R. 1991. Increases in surgeonfish populations after mass mortality of the sea urchin *Diadema antillarum* in Panama indicate food limitation. *Marine Biology* 111:437–444.
- Rogers, A., and K. Lorenzen. 2016. Does slow and variable recovery of *Diadema antillarum* on Caribbean fore-reefs reflect density-dependent habitat selection? *Frontiers in Marine Science* 3:63. doi:10.3389/fmars.2016.00063.
- Rogers, C.S. 2008. Coral bleaching and disease should not be underestimated as causes of Caribbean coral reef decline. *Proceedings Royal Society London B* 276:197–198.
- Rogers, C.S., and J. Miller. 2006. Permanent 'phase shifts' or reversible declines in coral cover? Lack of recovery of two coral reefs in St. John, US Virgin Islands. *Marine Ecology Progress Series* 306:103–114.
- Rotjan R.D., J.L. Dimond, D.J. Thornhill, J.J. Leichter, B. Helmuth, D.W. Kemp, and S.M. Lewis. 2006. Chronic parrotfish grazing impedes coral recovery after bleaching. *Coral Reefs* 25:361–368.



- Russ, G.R., S.L.A. Questel, J.R. Rizzari, and A.C. Alcalá. 2015. The parrotfish–coral relationship: refuting the ubiquity of a prevailing paradigm. *Marine Biology* 162:2029–2045.
- Ruzicka, R.R., M.A. Colella, J.W. Porter, J.M. Morrison, J.A. Kidney, V. Brinkhuis, K.S. Lunz, K.A. Macaulay, L.A. Bartlett, M.A. Meyers, and J. Colee. 2013. Temporal changes in benthic assemblages on Florida Keys reefs 11 years after the 1997/1998 El Niño. *Marine Ecology Progress Series* 489:125–141.
- Sandin, S., and D. McNamara. 2012. Spatial dynamics of benthic competition on coral reefs. *Oecologia* 168:1079–1090.
- Scheffer, M., and S.R. Carpenter. 2003. Catastrophic regime shifts in ecosystems: linking theory to observation. *Trends in Ecology and Evolution* 18:648–656.
- Scheffers, S.R., A. Scheffers, U. Radtke, D. Kelletat, K. Staben, and R.P.M. Bak. 2006. Tsunami triggers long-lasting phase-shifts in coral reef ecosystem. In: Scheffers A, Kelletat D, editors. Tsunamis, hurricanes and neotectonics as driving mechanisms in coastal evolution. *Proceedings Bonaire Field Symposium, March 2–6, 2006. IGCP Contribution #495, Zeitschrift für Geomorphologie Supplementband* 146:59–79.
- Schutte, V.G.W., E.R. Selig ER, and J.F. Bruno. 2010. Regional spatio-temporal trends in Caribbean coral reef benthic communities. *Marine Ecology Progress Series* 402:115–122.
- Selig, E.R., and J.F. Bruno. 2010. A global analysis of the effectiveness of marine protected areas in preventing coral loss. *PLoS ONE* 5:e9278; doi:10.1371/journal.pone.0009278.
- Selig, E.R., K.S. Casey, and J.F. Bruno. 2012. Temperature-driven coral decline: the role of marine protected areas. *Global Change Biology* 18:1561–1570.
- Sheppard, C. 1993. Coral reef environmental science: dichotomies, not the Cassandras, are false. *Reef Encounter* 14:12–13.
- Smith, J.E., C.L. Hunter, and C.M. Smith. 2010. The effects of top–down versus bottom–up control on benthic coral reef community structure. *Oecologia* 163:497–507.
- Smith, T.B., M.E. Brandt, J.M. Calnan, R.S. Nemeth, J. Blondeau, E. Kadison, M. Taylor, and P. Rothenberger. 2013. Convergent mortality responses of Caribbean coral species to seawater warming. *Ecosphere* 4(7):87.
- Steneck, R.S. 1988. Herbivory on coral reefs: a synthesis. *Proceedings of the 6<sup>th</sup> International Coral Reef Symposium, Townsville* 1:37–49.
- Steneck, R.S., and E.A. Sala. 2005. Large marine carnivores: trophic cascades and top-down controls in coastal ecosystems past and present. In: Ray JC, Redford KH, Steneck R, Berger J, editors. *Large carnivores and the conservation of biodiversity*. Island Press, Washington, D.C., USA. p 110–137.
- Sotka, E.E., and M.E. Hay. 2009. Effects of herbivores, nutrient enrichment, and their interactions on macroalgal proliferation and coral growth. *Coral Reefs* 28:555–568.
- Stoddart, D.R. 1985. Hurricane effects on coral reefs. *Proceedings of the 5<sup>th</sup> International Coral Reef Congress, Tahiti* 3:349–350.
- Stockwell, B., C.R.L. Jadloc, R.A. Abesamis, A.C. Alcalá, and G.R. Russ. 2009. Trophic and benthic responses to no-take marine reserve protection in the Philippines. *Marine Ecology Progress Series* 389:1–15.
- Suchley, A., M.D. McField, and L. Alvarez-Filip. 2016. Rapidly increasing macroalgal cover not related to herbivorous fishes on Mesoamerican reefs. *PeerJ* 4:e2084; <https://doi.org/10.7717/peerj.2084>.
- Szmant, A.M. 2002. Nutrient enrichment on coral reefs: Is it a major cause of coral reef decline? *Estuaries* 25:743–766.



- Toth, L.T., A. Stathakopoulos, I.B. Kuffner, R.R. Ruzicka, M.A. Colella, and E.A. Shinn. 2019. The unprecedented loss of Florida's reef-building corals and the emergence of a novel coral-reef assemblage. *Ecology*, p.e02781. doi: 10.1002/ecy.2781:
- Toth, L.T., R. Van Woesik, T.J.T. Murdoch, S.R. Smith, J.C. Ogden, W.F. Precht, and R.B. Aronson. 2014. Do no-take reserves benefit Florida's corals? 14 years of change and stasis in the Florida Keys National Marine Sanctuary. *Coral Reefs* 33:565–577.
- Tsounis, G., and P.J. Edmunds. 2017. Three decades of coral reef community dynamics in St. John, USVI: a contrast of scleractinians and octocorals. *Ecosphere* 8(1):e01646.
- van Woesik, R., W.J. Scott IV, and R.B. Aronson. 2014. Lost opportunities: Coral recruitment does not translate to reef recovery in the Florida Keys. *Marine Pollution Bulletin* 88:110–117.
- Veron, J.E.N., O. Hoegh-Guldberg, T.M. Lenton, J.M. Lough, D.O. Obura, P. Pearce-Kelly, C.R.C. Sheppard, M. Spalding, M.G. Stafford-Smith, and A.D. Rogers. 2009. The coral reef crisis: The critical importance of <350 ppm CO<sub>2</sub>. *Marine Pollution Bulletin* 58:1428–1436.
- Vroom, P.S., K.N. Page, J.C. Kenyon, and R.E. Brainard. 2006. Algae-dominated reefs. *American Scientist* 94:430–437.
- Webber, M., E. Edwards-Myers, C. Campbell, and D. Webber. 2005. Phytoplankton and zooplankton as indicators of water quality in Discovery Bay, Jamaica. *Hydrobiologia* 545:177–193.
- Wilkinson, C.R. 2002. Status of coral reefs of the world: 2002. GCRMN, Townsville, Australia.
- Williams, I.D., and N.V.C. Polunin. 2001. Large-scale associations between macroalgal cover and grazer biomass on mid-depth reefs in the Caribbean. *Coral Reefs* 19:358–366.
- Woodley, J.D., E.A. Chornesky, P.A. Clifford, J.B.C. Jackson, L.S. Kaufman, N. Knowlton, J.C. Lang, M.P. Pearson, J.W. Porter, M.C. Rooney, K.W. Rylaarsdam, C.M. Wahle, J.L. Wulff, A.S.G. Curtis, M.D. Dallmeyer, B.P. Jupp, M.A.R. Koehl, J. Neigel, and E.M. Sides. 1981. Hurricane Allen's impact on Jamaican coral reefs. *Science* 214:749–755.
- Żychaluk, K., J.F. Bruno, D. Clancy, T.R. McClanahan, M. Spencer. 2012. Data-driven models for regional coral-reef dynamics. *Ecology Letters* 15:151–158.
